# Supplementary material
Source: PubMed Central journal article supplement (PMC9649881)
Supplement: NIHMS1837507-supplement-Supplementary_Material.pdf [file NIHMS1837507-supplement-Supplementary_Material.pdf]

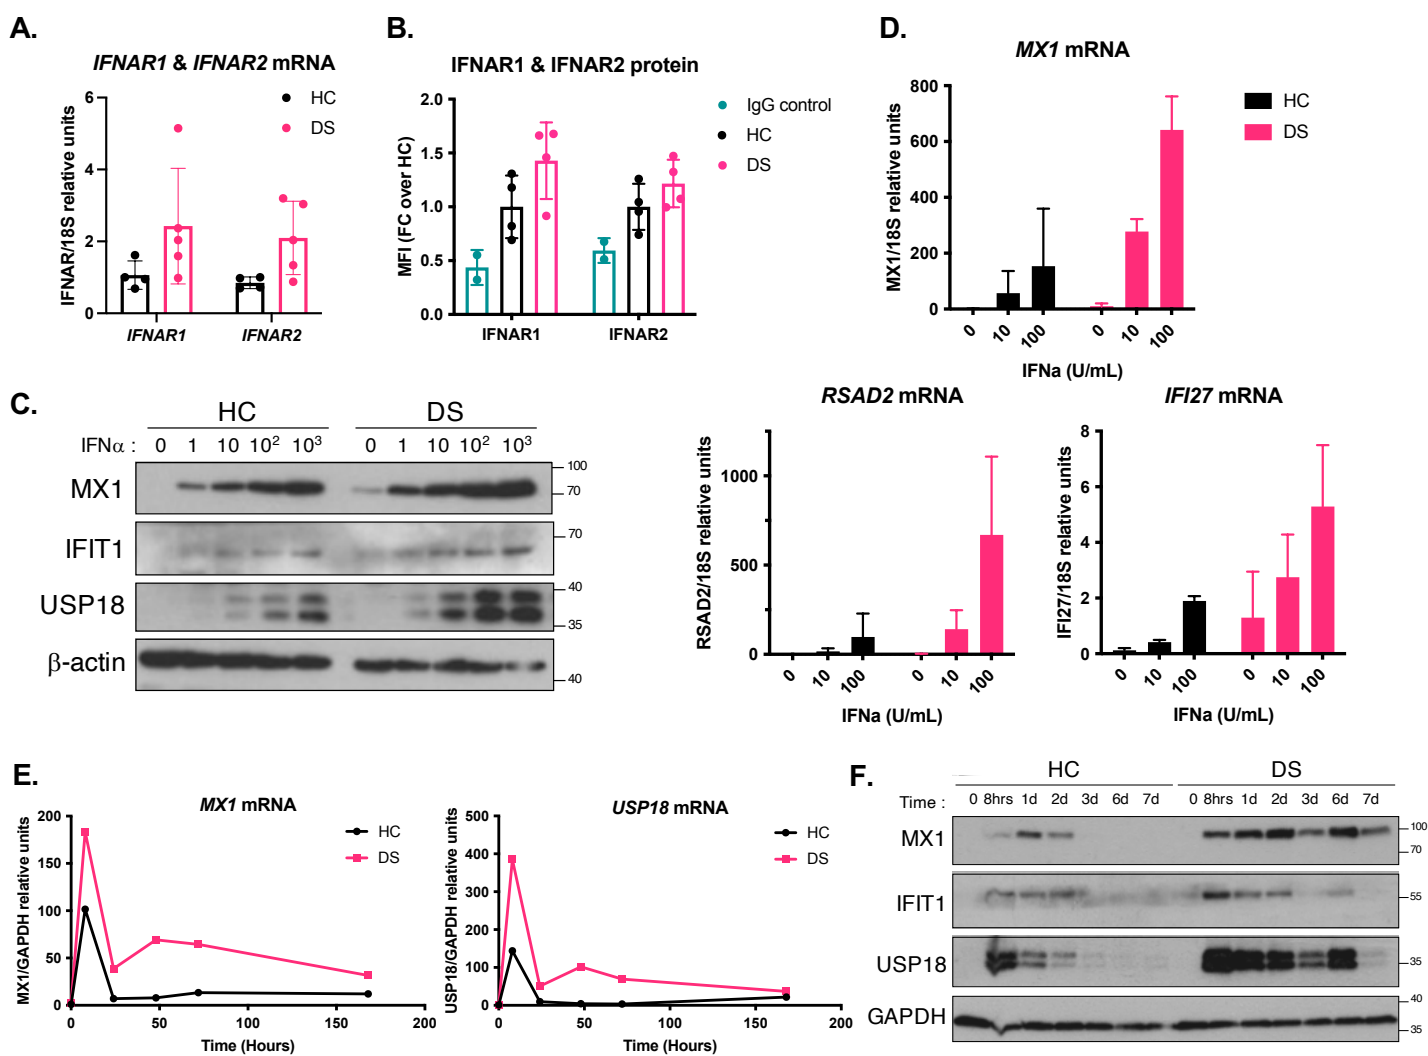

**Supplemental Figure 1. Hyper-response to IFN-I in DS hTERT fibroblasts.**

**(A)** qPCR and **(B)** Flow cytometry quantification of *IFNAR1* and *IFNAR2* expression in hTERT-immortalized fibroblasts from healthy controls (HC,  $n=4$ ) or individuals with DS (DS,  $n=4$ ).

**(C)** Immunoblotting and **(D)** qPCR for ISG induction in HC ( $n=4$ ) and DS ( $n=4$ ) hTERT-immortalized fibroblasts stimulated for 30 min with indicated doses of IFN- $\alpha$  (IU/mL) followed by rest in untreated media for 24 hours (protein, B) or 6 hours (mRNA, C).

**(E)** qPCR and **(F)**. Immunoblotting for ISG induction after stimulation with IFN- $\alpha$  (10 IU/mL) for 8 hours, wash, and rest for indicated times. Result representative of of fibroblasts derived from  $n=3$  HCs and  $n=3$  individuals with DS.

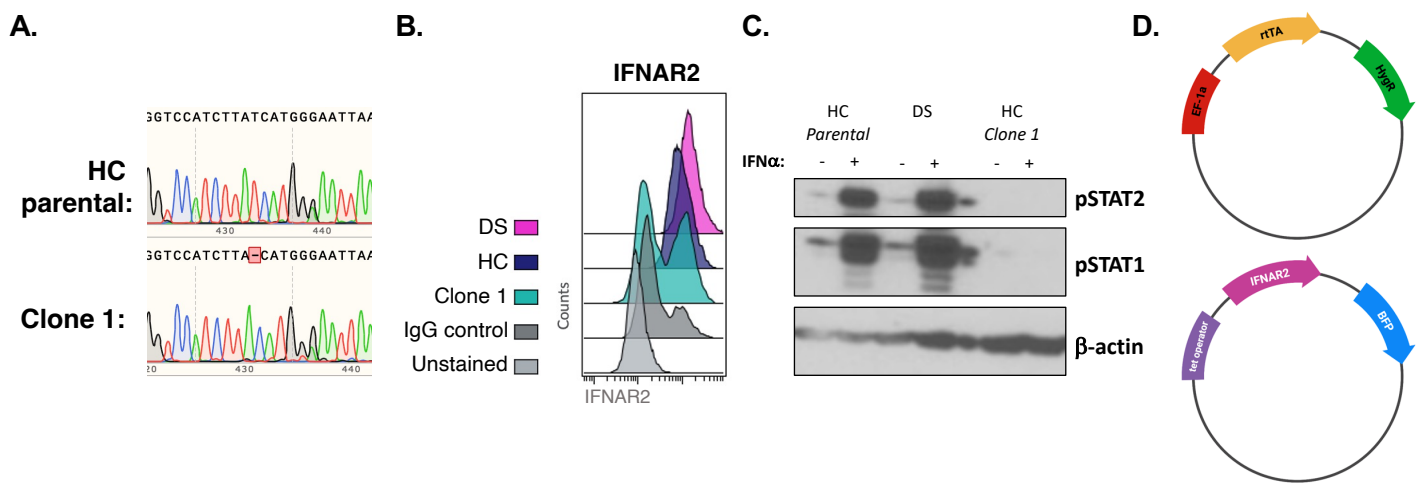

**Supplemental Figure 2. Doxycycline-inducible *IFNAR2* system in hTERT fibroblasts.**

- (A)** Sanger sequencing of genomic DNA confirming 1 amino acid deletion in *IFNAR2* knockout Clone 1.
- (B)** Flow cytometry quantification of *IFNAR2* confirming lack of expression in *IFNAR2* knockout Clone 1.
- (C)** Immunoblotting for STAT phosphorylation after stimulation for 30 min with IFN- $\alpha$  (1000 IU/mL) confirming lack of response in *IFNAR2* knockout Clone 1.
- (D)** Diagram of 2-plasmid system used for lentiviral doxycycline-inducible *IFNAR2* expression.

A.

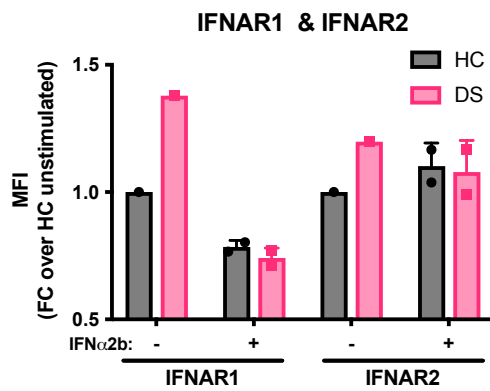

B.

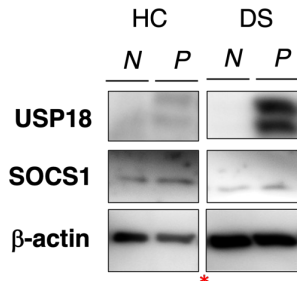

C.

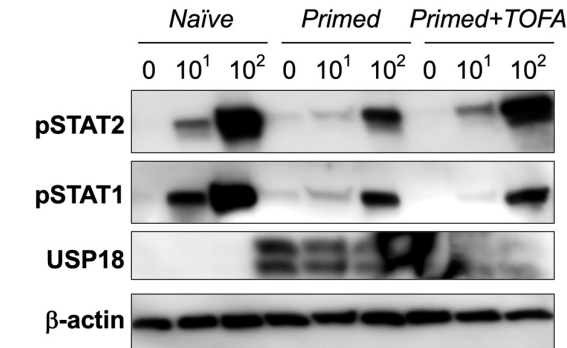

**IFN-I negative regulation in presence of Jak inhibition**

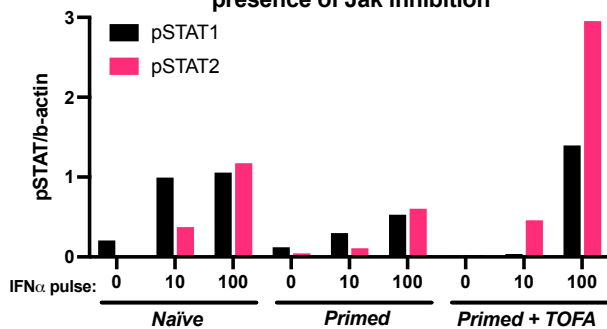

D.

**Dynamics of IFNAR negative regulation**

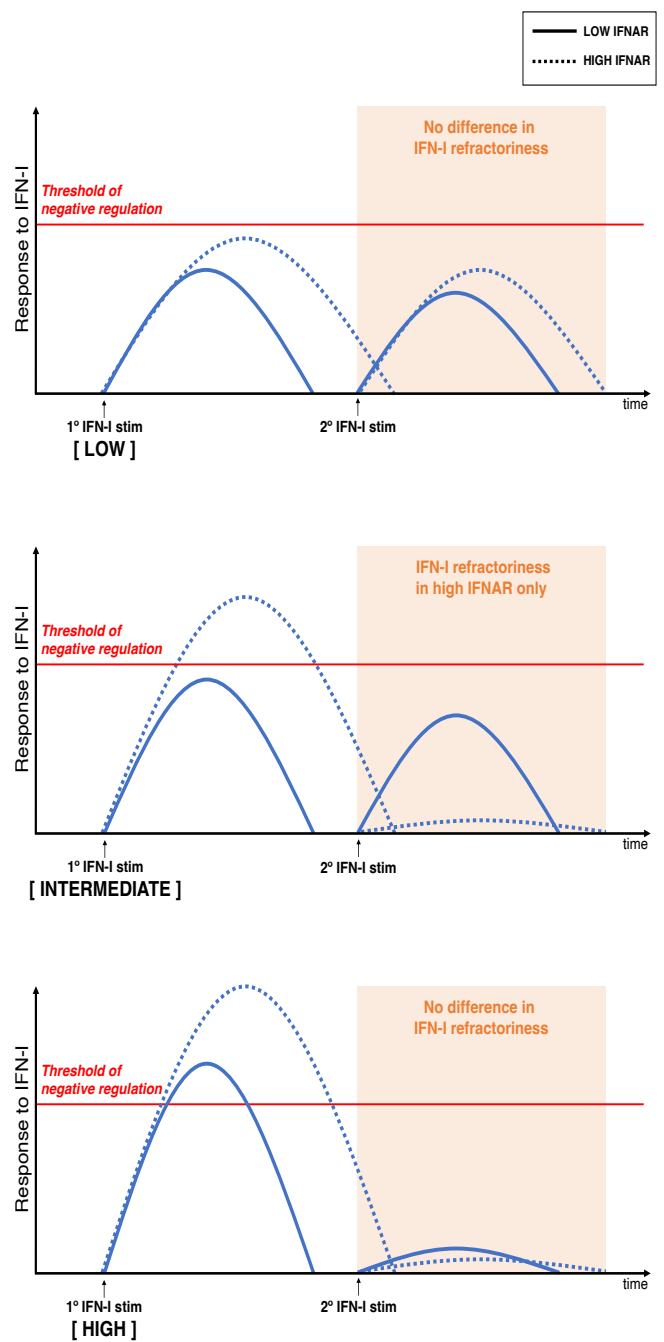

E.

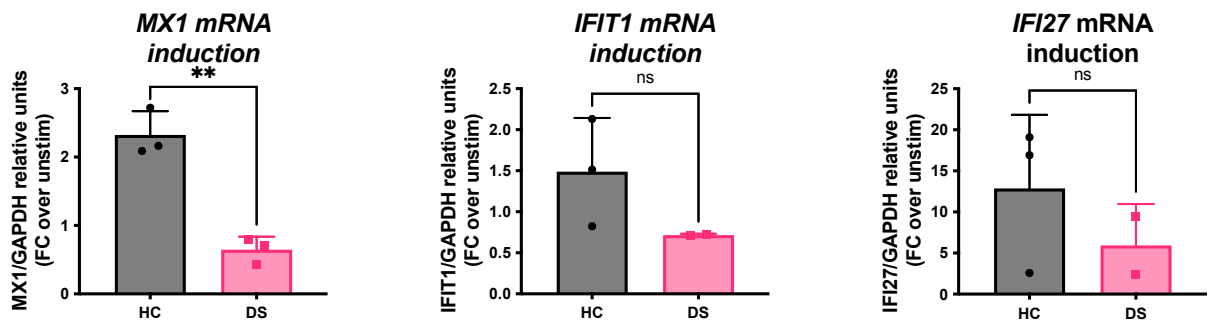

### **Supplemental Figure 3. Increased IFNAR negative regulation in Down syndrome.**

**(A)** Flow cytometry quantification of *IFNAR1* and *IFNAR2* expression in the HC and DS hTERT-immortalized fibroblasts previously stimulated (+) or not (+) with a primary stimulus of IFN- $\alpha$  (10 IU/mL) for 12 h, washed, and allowed to rest for 36 h.

**(B)** Immunoblotting for SOCS1 in HC and DS hTERT-immortalized fibroblasts previously stimulated (N) or not (P) with a primary stimulus of IFN- $\alpha$  (10 IU/mL) for 12 h, washed, and allowed to rest for 36 h. \*image was cropped to remove irrelevant lanes.

**(C)** DS hTERT-immortalized fibroblasts were or untreated (Naïve) or stimulated with IFN- $\alpha$  (10 IU/mL) for 8 hours and Tofacitinib (50mM) was added at hour 2 (Primed +TOFA) or not (Primed). Cells were washed, allowed to rest for 36 h, and re-stimulated for 15 min with IFN- $\alpha$ . Immunoblotted for STAT phosphorylation and quantification.

**(D)** Diagram of engagement of IFN-I refractoriness with increasing levels of IFN- $\alpha$  priming dose and increasing levels of *IFNAR2* expression.

**(E)** qPCR for ISG induction in PBMCs derived from HCs ( $n=2$ ) and individuals with DS ( $n=3$ ), stimulated with 100 IU/mL IFN- $\alpha$  for 30 min followed by rest in untreated media for 6 hours (mRNA, C). Expressed as fold-induction over individual's baseline.
